# Supplementary material
Source: bioRxiv or medRxiv preprint supplement (http://medrxiv.org/highwire/filestream/88949/field_highwire_adjunct_files/0/2020.07.08.20148791-1.pdf)
Supplement: Supplementary file [file 2020.07.08.20148791-1.pdf]

## SUPPLEMENTAL DATA

| Table 1. Schedule of study procedures for the target and source populations |                             |                                 |
|-----------------------------------------------------------------------------|-----------------------------|---------------------------------|
| Procedures                                                                  | Target population           | Source population               |
|                                                                             | Throughout the study period | Within 30 days prior to surgery |
| Verify eligibility criteria                                                 | X                           |                                 |
| Collection of anonymized surveillance data                                  | X                           |                                 |
| Written informed consent                                                    |                             | X <sup>a</sup>                  |
| Nasal swab for <i>S. aureus</i> colonization status                         |                             | X <sup>b,c,e</sup>              |
| Throat swab for <i>S. aureus</i> colonization status                        |                             | X <sup>b,c,e</sup>              |
| Perineal swab for <i>S. aureus</i> colonization status                      |                             | X <sup>b,c,e</sup>              |
| Preoperative blood sample (serum)                                           |                             | X <sup>d</sup>                  |
| Assignment of SID number                                                    |                             | X                               |
| Collection of data from medical chart                                       |                             | X                               |

<sup>a</sup> For emergency surgeries, IC may be obtained up to 72 hours after the surgery.

<sup>b</sup> Semi-quantitative testing on provided chromogenic media to occur at the local laboratory.

<sup>c</sup> *S. aureus* strains will be prepared in microbanks by the local laboratory and shipped to the central laboratory.

<sup>d</sup> Aliquots will be prepared in the local laboratory and shipped to the central laboratory. Testing to occur at a central laboratory.

<sup>e</sup> Every attempt should be made to collect all 3 preoperative screening swabs from subjects undergoing emergency surgery. If all 3 samples cannot be collected, a nose swab AND throat OR perineal swab must be collected.

| Table 2. Schedule of study procedures for study cohort population |                              |                                      |                    |                                                                    |                      |                                   |
|-------------------------------------------------------------------|------------------------------|--------------------------------------|--------------------|--------------------------------------------------------------------|----------------------|-----------------------------------|
| Procedures                                                        | Study cohort population      |                                      |                    |                                                                    | In case of a SSI     |                                   |
|                                                                   | < 72 hours after the surgery | Across hospital stay until discharge | Hospital discharge | Post-discharge follow-up                                           | Day of SSI diagnosis | Day 28 +/- 14 after SSI diagnosis |
|                                                                   |                              |                                      |                    | Day 7, day 14, day 21, day 28, day 60 and day 90 (+/- 3 days each) |                      |                                   |
| Enrollment in the study cohort                                    | X <sup>a</sup>               |                                      |                    |                                                                    |                      |                                   |
| Collection of additional data from the medical chart              |                              | X                                    |                    | X                                                                  |                      |                                   |
| Assessment of post-surgical infectious status                     |                              | X <sup>b</sup>                       |                    | X <sup>b</sup>                                                     |                      |                                   |
| Assessment of post-surgical mortality status                      |                              |                                      | X                  | X                                                                  |                      |                                   |
| Surgical site sample                                              |                              |                                      |                    |                                                                    | X <sup>c</sup>       |                                   |
| Post-SSI blood sample (serum)                                     |                              |                                      |                    |                                                                    |                      | X <sup>d</sup>                    |

<sup>a</sup> Only if the subject is *S. aureus* colonized (then always include), or non-colonized, but is preceded by (at least) 2 enrolled *S. aureus* colonized subjects.

<sup>b</sup> Microbanks of *S. aureus* strains cultured from routine clinical microbiological samples (samples taken for medical care purposes) will be prepared by the local laboratory and shipped to the central laboratory.

<sup>c</sup> Testing to occur at the local laboratory. If *S. aureus* is found, microbanks of the infecting *S. aureus* strains will be prepared and shipped to the central laboratory.

<sup>d</sup> Collection will occur only if available, e.g. if a routine postoperative visit is planned at the moment that the sample should be collected. Aliquots will be prepared in the local laboratory and shipped to the central laboratory for testing.

## STUDY OBJECTIVES

### Primary Objective

1. To assess the incidence of ***S. aureus* SSI** (composite of superficial, deep, and organ/space *S. aureus* SSI) up to 90 days following surgery and its independent association with patient-related, pathogen-related and contextual factors.

### Secondary Objectives

1. To develop risk prediction models to quantify the risk of acquiring a *S. aureus* SSI and *S. aureus* bloodstream infection (BSI) up to 90 days following surgery, by using a composite score of independent risk factors identified through the primary objective.
2. To assess the incidence of **serious *S. aureus* SSI** (deep and organ/space *S. aureus* SSI) up to 90 days following surgery and its independent association with patient-related, pathogen-related and contextual factors.
3. To assess the incidence of ***S. aureus* BSI** up to 90 days following surgery and its independent association with patient-related, pathogen-related and contextual factors.
4. To assess the incidence of **other post-surgical *S. aureus* infections** up to 90 days following surgery.
5. To assess the incidence of **all-cause SSI**, by etiologic agent, and to describe its temporal distribution up to 90 days following surgery.
6. To assess the incidence of ***S. aureus* SSI stratified by antibiotic susceptibility** (e.g. methicillin-susceptible *S. aureus* (MSSA) versus methicillin-resistant *S. aureus* (MRSA)).
7. To compare the prevalence of preoperative *S. aureus* colonization in the nose, throat, and perineal region.
8. To assess the incidence of ***S. aureus* SSI stratified by location of preoperative *S. aureus* colonization.**
9. To assess the colonizing bacterial load of *S. aureus* in the nose, throat, and perineal region semi-quantitatively, and its independent association with *S. aureus* infection up to 90 days following surgery.
10. To assess the incidence of **postsurgical all-cause mortality** up to 90 days following surgery and its independent association with patient-related and contextual factors.
11. To characterize the *S. aureus* isolates involved in *S. aureus* colonization and infection.
12. To explore the role of antibodies against *S. aureus* virulence factors as potential biomarkers associated with *S. aureus* infection.
13. To compare the study cohort population against the target population.

## Exploratory Objectives

1. To describe the magnitude of healthcare utilization associated with *S. aureus* SSI in terms of:
  - a. Length of stay (LOS) after the index surgery.
  - b. Incidence of readmissions, including re-interventions.
  - c. LOS during readmissions
2. To assess the incidence of ***S. aureus* SSI stratified by participating country.**
3. To assess the incidence of ***S. aureus* SSI stratified by type of surgery.**
4. To assess the incidence of ***S. aureus* SSI stratified by wound classification.**
5. To assess the incidence of ***S. aureus* SSI stratified by the urgency of surgery.**
6. To assess the incidence of ***S. aureus* SSI stratified by American Society of Anesthesiologists physical status (ASA PS) classification.**
7. To assess the risk prediction model derived in Work Package 6A stage 1.

## STUDY OUTCOMES

### Primary study outcome

1. Incidence of *S. aureus* SSI up to 90 days following surgery.

### Secondary study outcomes

1. Time to *S. aureus* SSI (superficial, deep, and organ-space *S. aureus* SSI) up to 90 days following surgery.
2. Incidence of **serious *S. aureus* SSI** (deep and organ/space *S. aureus* SSI) up to 90 days following surgery.
3. Incidence of *S. aureus* BSI up to 90 days following surgery.
4. Time to *S. aureus* BSI up to 90 days following surgery.
5. Incidence of **other post-surgical *S. aureus* infection** up to 90 days following surgery.
6. Time to **other post-surgical *S. aureus* infection** up to 90 days following surgery.
7. Incidence of **all-cause SSI**, by etiologic agent, up to 90 days following surgery.
8. Time to **all-cause SSI** up to 90 days following surgery.
9. Incidence of *S. aureus* SSI **stratified by antibiotic susceptibility** (e.g. MSSA vs. MRSA).
10. Prevalence of preoperative *S. aureus* colonization in nose, throat and perineal region.
11. Incidence of *S. aureus* SSI **stratified by location of preoperative *S. aureus* colonization**.
12. Semi-quantification of the bacterial load of colonizing *S. aureus*.
13. Incidence of **post-surgical all-cause mortality** up to 90 days following surgery.
14. Time to **post-surgical death of all causes** up to 90 days following surgery.
15. Clonal type, gene sequence, and expression of certain virulence factors of *S. aureus* isolates involved in colonization and infection.
16. Serum antibody levels against *S. aureus* virulence factors.

### Exploratory outcomes

1. Magnitude of healthcare utilization associated with *S. aureus* SSI up to 90 days following surgery in terms of:
  - a. Duration of LOS
  - b. Incidence of readmissions, including re-interventions due to *S. aureus* SSI up to 90 days following surgery.
  - c. Duration of LOS during readmissions.
2. Incidence of *S. aureus* SSI up to 90 days following surgery, **stratified by participating country**.
3. Incidence of *S. aureus* SSI up to 90 days following surgery, **stratified by type of surgery**.
4. Incidence of *S. aureus* SSI up to 90 days following surgery, **stratified by wound classification**.

5. Incidence of *S. aureus* SSI up to 90 days following surgery, **stratified by urgency of surgery.**
6. Incidence of *S. aureus* SSI up to 90 days following surgery, **stratified by ASA PS-classification.**
7. Risk assessment of the risk prediction model derived in Work Package 6A stage 1.
